# Supplementary material for: A protocol to obtain multidimensional quantum tunneling corrections derived from QM(DFT)/MM calculations for an enzyme reaction
Source: Royal Society of Chemistry journal article supplement (doi:10.1039/d0cp05265e), 2020-01-01
Supplement: d0cp05265e1.pdf [file d0cp05265e1.pdf]

## Electronic Supplementary Information

for

### A protocol to obtain multidimensional quantum tunneling corrections derived from QM(DFT)/MM calculations for an enzyme reaction

Jordi Soler,<sup>1,&</sup> Àngels González-Lafont<sup>1,2</sup> and José M. Lluch<sup>1,2</sup>

<sup>1</sup> Departament de Química and <sup>2</sup> Institut de Biotecnologia i de Biomedicina (IBB), Universitat Autònoma de Barcelona, 08193, Bellaterra, Barcelona, Spain.

<sup>&</sup> Current address: Institute of Computational Chemistry and Catalysis, and Department of Chemistry, University of Girona, Girona, Spain.

#### Table of contents.

- **Table S1.** RESP charges for the Fe coordination sphere and the substrate. p. S2
- **Table S2.** Eckart parameters and imaginary frequencies for the different structures. p. S4
- **Figure S1.** Potential energy profiles for structure II-B obtained with different methods. p. S5
- **Figure S2.** Potential energy profiles for structure VII obtained with different methods. p. S6
- **Figure S3.** Adiabatic potential energy profiles (A) and zero-point energies along the reaction path (B) obtained using different interpolation levels for structure II-B. p. S7
- **Figure S4.** Adiabatic potential energy profiles (A) and zero-point energies along the reaction path (B) obtained using different interpolation levels for structure VII. p. S8
- **Figure S5.** MEPs calculated with ONIOM and the Electronically Embedding approach with different isotopes for structure XI. p. S9
- **Figures S6.** Adiabatic potential energy profiles (A) and zero-point energies along the reaction path (B) obtained for different isotopes in structure XI. p. S10
- **Figure S7.** Too short adiabatic potential energy profiles and non-converged  $f(E)$  for structure XI. p. S11
- **Table S3-S9.** Cartesian atomic coordinates of the optimized TS p. S12

**Table S1.** RESP charges (a.u.) for the Fe coordination sphere and the substrate.

| Atom | Atom Type | His545    | Atom | Atom Type | Ile663    |
|------|-----------|-----------|------|-----------|-----------|
| N    | N         | -0.4157   | N    | N         | -0.423664 |
| H    | H         | 0.296918  | H    | H         | 0.283954  |
| C    | CT        | -0.0581   | C    | CT        | -0.020495 |
| H    | H1        | 0.082154  | H    | H1        | 0.144139  |
| C    | CT        | 0.114206  | C    | CT        | 0.012376  |
| H    | HC        | -0.018473 | H    | HC        | 0.061564  |
| H    | HC        | -0.018473 | C    | CT        | -0.129463 |
| N    | NB        | 0.008309  | H    | HC        | 0.023324  |
| C    | CC        | -0.025211 | H    | HC        | 0.023324  |
| C    | CR        | -0.09944  | H    | HC        | 0.023324  |
| H    | H5        | 0.179804  | C    | CT        | -0.047630 |
| N    | NA        | -0.084421 | H    | HC        | 0.035170  |
| H    | H         | 0.30178   | H    | HC        | 0.035170  |
| C    | CW        | -0.194645 | C    | CT        | -0.086106 |
| H    | H4        | 0.174221  | H    | HC        | 0.031096  |
| C    | C         | 0.5973    | H    | HC        | 0.031096  |
| O    | O         | -0.5679   | H    | HC        | 0.031096  |
|      |           |           | C    | C         | 0.368333  |
|      |           |           | O    | O2        | -0.437161 |
|      |           |           | O    | OXT       | -0.489009 |

| Atom | Atom Type | His361    | His366    | His541    |
|------|-----------|-----------|-----------|-----------|
| N    | N         | -0.4157   | -0.4157   | -0.4157   |
| H    | H         | 0.273195  | 0.353492  | 0.306443  |
| C    | CT        | 0.0188    | 0.0188    | 0.0188    |
| H    | H1        | 0.120538  | 0.077848  | 0.129221  |
| C    | CT        | -0.093496 | -0.15132  | 0.016624  |
| H    | HC        | 0.077182  | 0.048673  | 0.037324  |
| H    | HC        | 0.077182  | 0.048673  | 0.037324  |
| N    | NA        | -0.111774 | -0.168678 | -0.163994 |
| H    | H         | 0.305275  | 0.313588  | 0.308713  |
| C    | CC        | -0.035013 | 0.15502   | 0.023307  |
| C    | CR        | -0.00794  | -0.063105 | -0.015225 |
| H    | H5        | 0.145093  | 0.196501  | 0.181732  |
| N    | NB        | -0.020841 | 0.020262  | -0.163891 |
| C    | CV        | -0.192828 | -0.295794 | -0.111133 |
| H    | H4        | 0.181224  | 0.211423  | 0.119343  |
| C    | C         | 0.5973    | 0.5973    | 0.5973    |
| O    | O         | -0.5679   | -0.5679   | -0.5679   |

| Atom | Atom Type | Cofactor  |
|------|-----------|-----------|
| Fe   | FE        | 0.472681  |
| O    | OW        | -0.702882 |
| H    | HW        | 0.419768  |

| Atom | AtomType | Linoleic Acid | Atom | AtomType | Linoleic Acid |
|------|----------|---------------|------|----------|---------------|
| C1   | C        | 0.91615       | C10  | CM       | -0.394615     |
| O1   | O2       | -0.848719     | H10  | HT       | 0.149634      |
| O2   | O2       | -0.850736     | C11  | CT       | 0.412378      |
| C2   | CT       | -0.314575     | H11A | HT       | 0.039167      |
| H2A  | HT       | 0.045474      | H11B | HT       | -0.022743     |
| H2B  | HT       | 0.034901      | C12  | CM       | -0.309574     |
| C3   | CT       | 0.020282      | H12  | HT       | 0.149156      |
| H3A  | HT       | 0.016183      | C13  | CM       | -0.349471     |
| H3B  | HT       | -0.000518     | H13  | HT       | 0.159179      |
| C4   | CT       | 0.12403       | C14  | CT       | 0.127951      |
| H4A  | HT       | -0.03985      | H14A | HT       | -0.017336     |
| H4B  | HT       | -0.00692      | H14A | HT       | 0.006911      |
| C5   | CT       | -0.056482     | C15  | CT       | 0.046761      |
| H5A  | HT       | 0.00154       | H15A | HT       | -0.000013     |
| H5B  | HT       | 0.003307      | H15B | HT       | 0.017495      |
| C6   | CT       | -0.056233     | C16  | CT       | -0.095465     |
| H6A  | HT       | 0.016682      | H16A | HT       | 0.005454      |
| H6B  | HT       | 0.005239      | H16B | HT       | 0.011534      |
| C7   | CT       | 0.035731      | C17  | CT       | 0.189557      |
| H7A  | HT       | 0.015851      | H17A | HT       | -0.03203      |
| H7B  | HT       | -0.010194     | H17B | HT       | -0.033771     |
| C8   | CT       | 0.033896      | C18  | CT       | -0.252203     |
| H8A  | HT       | 0.033587      | H18A | HT       | 0.051835      |
| H8B  | HT       | -0.008828     | H18B | HT       | 0.058213      |
| C9   | CM       | -0.226036     | H11C | HT       | 0.050013      |
| H9   | HT       | 0.14822       |      |          |               |

**Table S2.** Eckart parameters and imaginary frequencies ( $\text{cm}^{-1}$ ) for each structure and isotope. **A** and **B** are given in kcal/mol, and **L** is given in bohr $\cdot$ amu<sup>1/2</sup>.

| Structure | Isotope | A     | B     | L    | Imaginary Frequency |
|-----------|---------|-------|-------|------|---------------------|
| II-B      | H       | -11.0 | 103.5 | 0.79 | 1825                |
|           | D       | -11.0 | 103.5 | 0.84 | 1379                |
| IV-A      | H       | -13.4 | 100.1 | 0.64 | 1882                |
|           | D       | -13.4 | 100.1 | 0.69 | 1418                |
| IV-B      | H       | -10.9 | 103.0 | 0.74 | 1874                |
|           | D       | -10.9 | 103.0 | 0.80 | 1412                |
| VII       | H       | -2.2  | 122.5 | 0.65 | 2130                |
|           | D       | -2.2  | 122.5 | 0.72 | 1592                |
| X         | H       | -13.7 | 90.7  | 0.46 | 2033                |
|           | D       | -13.7 | 90.7  | 0.52 | 1522                |
| XI        | H       | -12.8 | 99.5  | 0.49 | 2085                |
|           | D       | -12.8 | 99.5  | 0.56 | 1561                |
| XIV       | H       | -10.8 | 105.1 | 0.76 | 1869                |
|           | D       | -10.8 | 105.1 | 0.81 | 1409                |

**Figure S1.** Potential energy profiles for structure II-B obtained with two methods. The dashed line corresponds to the MEP calculated with ONIOM and the Mechanical Embedding approach, while the solid line stands for the Electrostatic Embedding MEP obtained with ONIOM. Each curve has been pictured with respect its own zero of energies. The green spot corresponds to the potential energy barrier taken from reference 32.

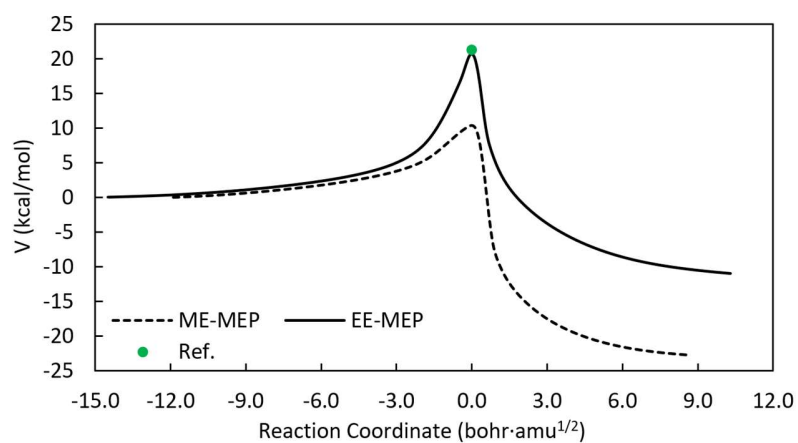

**Figure S2.** Potential energy profiles for structure VII obtained with two methods. The dashed line corresponds to the MEP calculated with ONIOM and the Mechanical Embedding approach, while the solid line stands for the Electrostatic Embedding MEP obtained with ONIOM. Each curve has been pictured with respect its own zero of energies. The green spot corresponds to the potential energy barrier taken from reference 32.

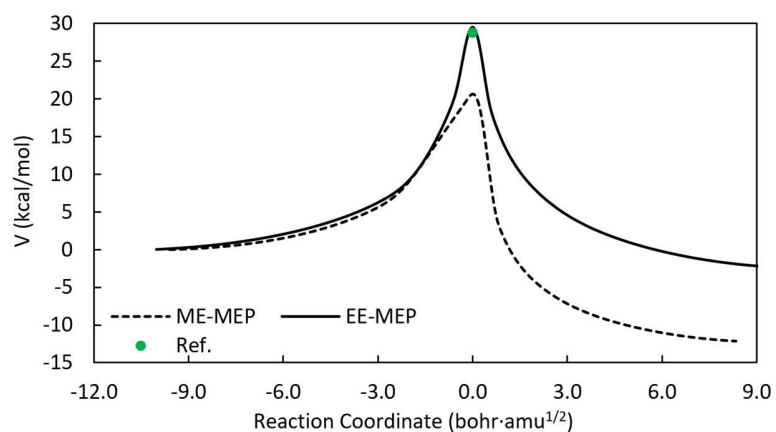

**Figure S3.** Adiabatic potential energy profiles (A) and zero-point energies along the reaction path (B) obtained using different interpolation levels for structure II-B.

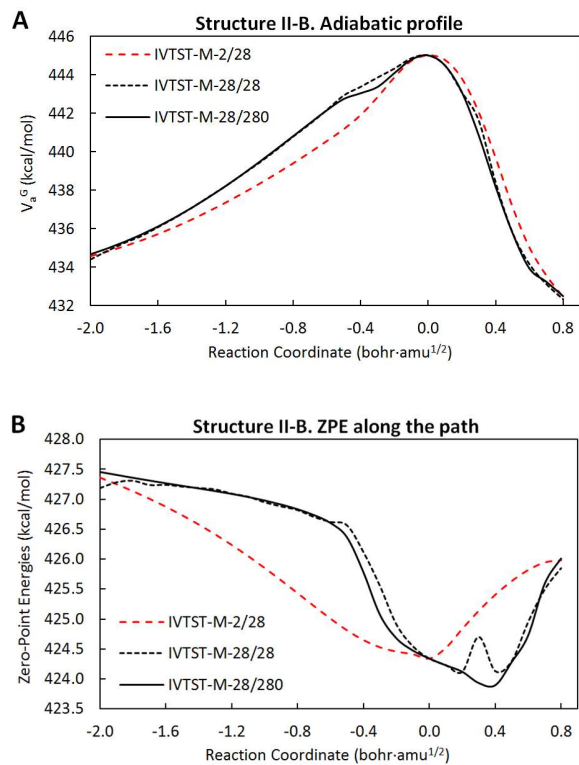

**Figure S4.** Adiabatic potential energy profiles (A) and zero-point energies along the reaction path (B) obtained using different interpolation levels for structure VII.

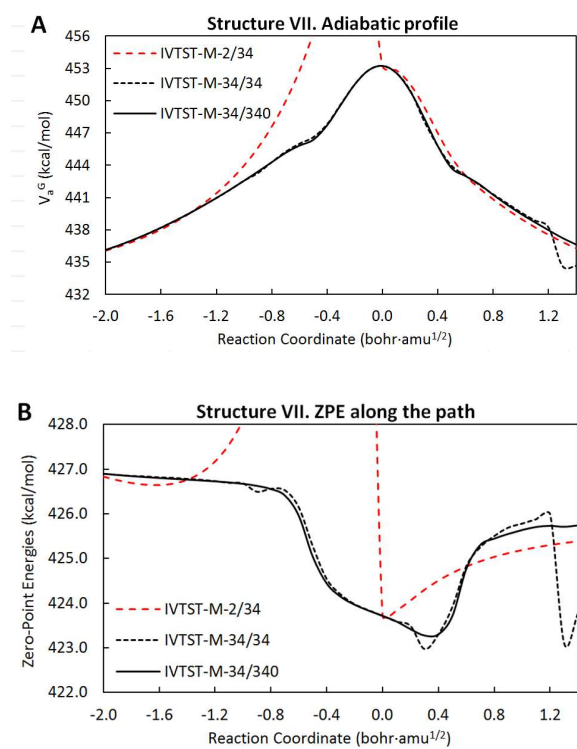



**Figure S5.** MEPs calculated with ONIOM and the Electronically Embedding approach with different isotopes for structure XI.

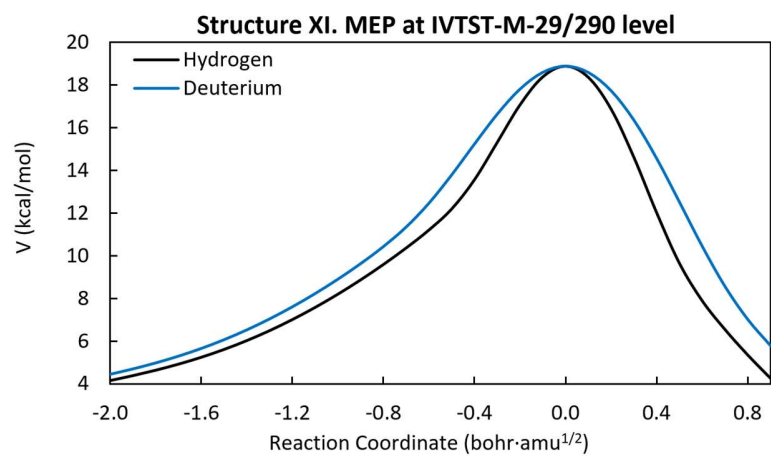

**Figure S6.** Adiabatic potential energy profiles (A) and zero-point energies along the reaction path (B) obtained for different isotopes in structure XI.

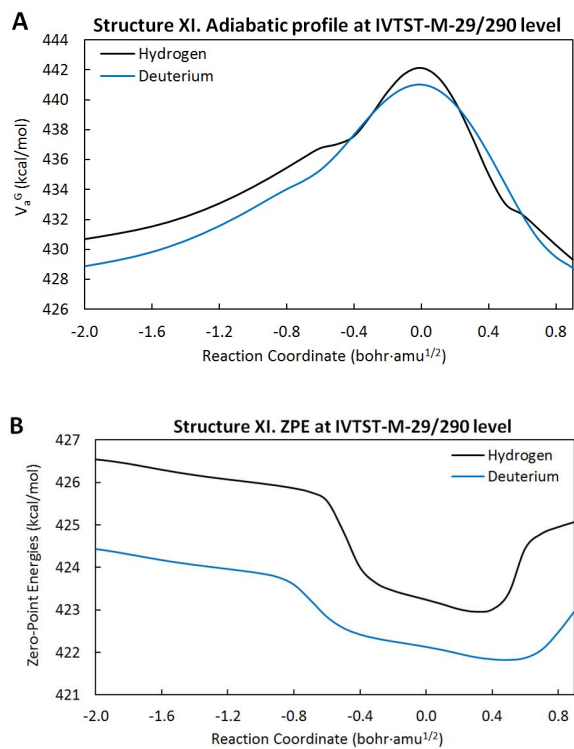

**Figure S7.** On the right, adiabatic potential energy profiles for Hydrogen (black) and Deuterium (blue) for structure XI calculated with the IVTST-M-29/290 highest level interpolation method only from  $s = -1.5$  to  $s = 0.6$  bohr  $\text{amu}^{1/2}$ . On the left, their corresponding functions  $f(E)$  calculated with the SCT method.

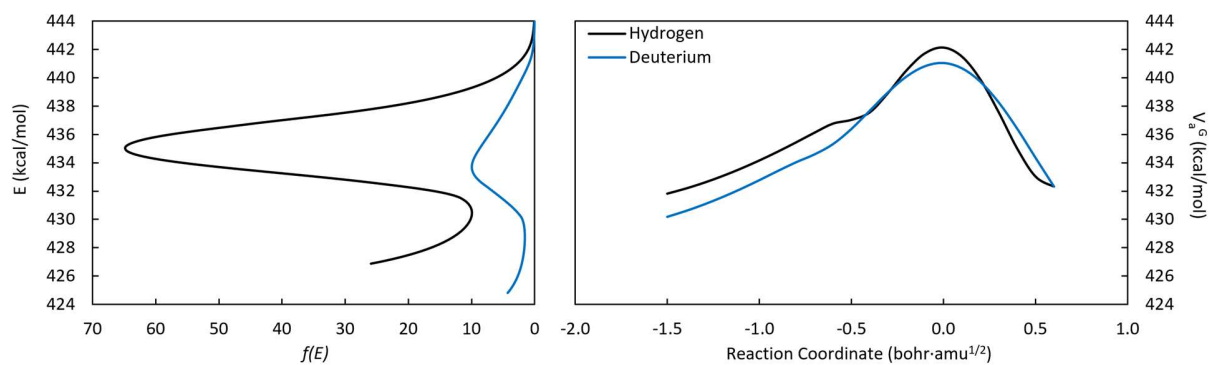

**Table S3.** Cartesian atomic coordinates of the QM region for the optimized Transition State geometry (ONIOM, Electrostatic Embedding) of structure II-B. *x*, *y* and *z* are given in Å.

| Atom | x         | y          | z         | Atom | x         | y         | z         |
|------|-----------|------------|-----------|------|-----------|-----------|-----------|
| C    | 1.084544  | -10.558702 | -1.327062 | C    | 2.988838  | -2.829496 | 3.539690  |
| H    | 0.004031  | -10.397880 | -1.409612 | H    | 2.700529  | -3.775322 | 4.015231  |
| H    | 1.496775  | -10.470384 | -2.339837 | H    | 4.072162  | -2.731105 | 3.661142  |
| C    | 1.693695  | -9.513298  | -0.378897 | N    | 1.363870  | -3.221425 | 1.653695  |
| H    | 2.759385  | -9.718329  | -0.201400 | H    | 0.629486  | -3.623098 | 2.245191  |
| H    | 1.192721  | -9.589186  | 0.595018  | C    | 2.627930  | -2.865996 | 2.090272  |
| C    | 1.553884  | -8.061131  | -0.893496 | C    | 1.317080  | -3.069449 | 0.312671  |
| H    | 0.523383  | -7.923487  | -1.252714 | H    | 0.458477  | -3.307617 | -0.294524 |
| H    | 2.192643  | -7.908415  | -1.765862 | N    | 2.472642  | -2.619662 | -0.148355 |
| C    | 1.802978  | -7.029834  | 0.173605  | C    | 3.300019  | -2.497380 | 0.953344  |
| H    | 1.034729  | -7.010236  | 0.948357  | H    | 4.324278  | -2.168346 | 0.864227  |
| C    | 2.803594  | -6.133570  | 0.354880  | C    | 0.145155  | 2.839175  | -1.493641 |
| H    | 2.673538  | -5.472246  | 1.209117  | H    | -0.880216 | 3.072907  | -1.796775 |
| C    | 4.073694  | -5.876054  | -0.354881 | H    | 0.186751  | 2.944416  | -0.407682 |
| H    | 4.746276  | -5.302258  | 0.289024  | N    | -0.307819 | 0.683867  | -2.737776 |
| H    | 3.848761  | -4.929189  | -1.265501 | H    | -1.227856 | 0.970385  | -3.081377 |
| C    | 4.769522  | -6.968137  | -1.065391 | C    | 0.494238  | 1.432790  | -1.890399 |
| H    | 4.179681  | -7.554580  | -1.765191 | C    | 0.289247  | -0.501881 | -2.975008 |
| C    | 6.059539  | -7.332011  | -0.921205 | H    | -0.129662 | -1.268748 | -3.601574 |
| H    | 6.419828  | -8.166251  | -1.525275 | N    | 1.449411  | -0.575760 | -2.326961 |
| C    | 7.093330  | -6.769110  | 0.018917  | C    | 1.583945  | 0.630604  | -1.644999 |
| H    | 7.241824  | -7.485393  | 0.845703  | H    | 2.443797  | 0.858638  | -1.035254 |
| H    | 6.743103  | -5.840106  | 0.482271  | C    | 3.026891  | 0.286067  | -5.453563 |
| C    | 8.448774  | -6.543327  | -0.672106 | H    | 2.133820  | 0.768176  | -5.864885 |
| H    | 8.336995  | -5.765311  | -1.435551 | H    | 3.017732  | 0.460811  | -4.374540 |
| H    | 8.720578  | -7.459050  | -1.213073 | N    | 3.212012  | -2.161914 | -4.730995 |
| C    | 9.604213  | -6.205603  | 0.276211  | C    | 3.007054  | -1.191705 | -5.712312 |
| H    | 10.543776 | -6.181881  | -0.292548 | C    | 3.291727  | -3.321085 | -5.374219 |
| H    | 9.697414  | -7.005637  | 1.024009  | H    | 3.437376  | -4.282732 | -4.920243 |
| C    | 7.443678  | 0.518656   | -0.318117 | N    | 3.123994  | -3.160820 | -6.703604 |
| H    | 8.231686  | -0.198369  | -0.044919 | H    | 3.173177  | -3.867474 | -7.436877 |
| H    | 7.938932  | 1.282601   | -0.927528 | C    | 2.928169  | -1.818683 | -6.932746 |
| N    | 6.713414  | -0.709897  | -2.366627 | H    | 2.753452  | -1.439720 | -7.930264 |
| H    | 7.604394  | -0.577772  | -2.848070 | C    | 0.816759  | -4.563544 | -3.385374 |
| C    | 6.395967  | -0.171182  | -1.134775 | O    | 1.684172  | -5.486035 | -3.433975 |
| C    | 5.627345  | -1.310718  | -2.881350 | O    | 0.947510  | -3.415379 | -2.879376 |
| H    | 5.602381  | -1.797199  | -3.843017 | Fe   | 2.781281  | -2.316342 | -2.318524 |
| N    | 4.600864  | -1.206091  | -2.045252 | O    | 3.718262  | -4.143421 | -2.328635 |
| C    | 5.068141  | -0.478445  | -0.958400 | H    | 3.016646  | -4.712994 | -2.747294 |
| H    | 4.417508  | -0.226133  | -0.137118 |      |           |           |           |

**Table S4.** Cartesian atomic coordinates of the QM region for the optimized Transition State geometry (ONIOM, Electrostatic Embedding) of structure IV-A. *x*, *y* and *z* are given in Å.

| Atom | x        | y          | z         | Atom | x         | y         | z         |
|------|----------|------------|-----------|------|-----------|-----------|-----------|
| C    | 1.226320 | -10.618761 | -1.230657 | C    | 3.165207  | -2.657662 | 3.619727  |
| H    | 0.181305 | -10.517153 | -0.911277 | H    | 2.941773  | -3.600831 | 4.136836  |
| H    | 1.272026 | -10.379669 | -2.298466 | H    | 4.243475  | -2.494646 | 3.707896  |
| C    | 2.118612 | -9.666496  | -0.410885 | N    | 1.492579  | -3.145352 | 1.803881  |
| H    | 3.179296 | -9.893923  | -0.583846 | H    | 0.752830  | -3.417771 | 2.459144  |
| H    | 1.929104 | -9.840898  | 0.656734  | C    | 2.771935  | -2.781939 | 2.186729  |
| C    | 1.898375 | -8.164027  | -0.716399 | C    | 1.415290  | -3.060331 | 0.456095  |
| H    | 0.824399 | -7.941266  | -0.620334 | H    | 0.534827  | -3.294961 | -0.119676 |
| H    | 2.165340 | -7.956075  | -1.757465 | N    | 2.572900  | -2.668723 | -0.056833 |
| C    | 2.656957 | -7.277324  | 0.241934  | C    | 3.427879  | -2.504267 | 1.017314  |
| H    | 2.303518 | -7.319344  | 1.274509  | H    | 4.459286  | -2.213673 | 0.887140  |
| C    | 3.742058 | -6.502324  | 0.006137  | C    | 0.226266  | 2.840550  | -1.196556 |
| H    | 4.160677 | -5.974994  | 0.863392  | H    | -0.818032 | 3.073115  | -1.434181 |
| C    | 4.384712 | -6.254428  | -1.293975 | H    | 0.339814  | 2.923017  | -0.111913 |
| H    | 4.216876 | -4.975090  | -1.638201 | N    | -0.274986 | 0.718426  | -2.482218 |
| H    | 3.806051 | -6.669383  | -2.121861 | H    | -1.203801 | 1.027965  | -2.779609 |
| C    | 5.823983 | -6.417236  | -1.571846 | C    | 0.559590  | 1.448942  | -1.650766 |
| H    | 6.060097 | -6.197883  | -2.613302 | C    | 0.322654  | -0.458601 | -2.779692 |
| C    | 6.872649 | -6.806934  | -0.816721 | H    | -0.117323 | -1.220425 | -3.402189 |
| H    | 7.838577 | -6.856761  | -1.325848 | N    | 1.510873  | -0.535252 | -2.188354 |
| C    | 6.935526 | -7.257680  | 0.617263  | C    | 1.666202  | 0.650686  | -1.483588 |
| H    | 7.006300 | -8.357973  | 0.627062  | H    | 2.561813  | 0.867486  | -0.923341 |
| H    | 6.017600 | -7.013838  | 1.159144  | C    | 2.990851  | 0.382030  | -5.384891 |
| C    | 8.158537 | -6.715066  | 1.384772  | H    | 2.093971  | 0.862225  | -5.796177 |
| H    | 9.061021 | -6.920842  | 0.794747  | H    | 2.981423  | 0.549869  | -4.304669 |
| H    | 8.263324 | -7.298913  | 2.307585  | N    | 3.271044  | -2.055501 | -4.677438 |
| C    | 8.084131 | -5.231942  | 1.788936  | C    | 2.990036  | -1.097097 | -5.649955 |
| H    | 8.749230 | -5.065803  | 2.644565  | C    | 3.377291  | -3.211296 | -5.323585 |
| H    | 7.065094 | -5.009581  | 2.132934  | H    | 3.613699  | -4.164218 | -4.886866 |
| C    | 7.550314 | 0.593145   | -0.187846 | N    | 3.153678  | -3.059809 | -6.645670 |
| H    | 8.310430 | -0.148321  | 0.099116  | H    | 3.158420  | -3.783045 | -7.363949 |
| H    | 8.077911 | 1.333746   | -0.798373 | C    | 2.885881  | -1.727597 | -6.867141 |
| N    | 6.764878 | -0.484264  | -2.300109 | H    | 2.685269  | -1.352666 | -7.861246 |
| H    | 7.676657 | -0.396674  | -2.755494 | C    | 0.976101  | -4.515909 | -3.167530 |
| C    | 6.487179 | -0.054688  | -1.016181 | O    | 1.896821  | -5.360346 | -3.294799 |
| C    | 5.661364 | -1.049050  | -2.822826 | O    | 1.050115  | -3.351923 | -2.667068 |
| H    | 5.601206 | -1.452928  | -3.819445 | Fe   | 2.893477  | -2.262849 | -2.210539 |
| N    | 4.663961 | -1.027189  | -1.944298 | O    | 3.965433  | -3.974429 | -2.459852 |
| C    | 5.169096 | -0.387138  | -0.818987 | H    | 3.259534  | -4.537096 | -2.891583 |
| H    | 4.550966 | -0.210017  | 0.045994  |      |           |           |           |

**Table S5.** Cartesian atomic coordinates of the QM region for the optimized Transition State geometry (ONIOM, Electrostatic Embedding) of structure IV-B. **x**, **y** and **z** are given in Å.

| Atom | x         | y          | z         | Atom | x         | y         | z         |
|------|-----------|------------|-----------|------|-----------|-----------|-----------|
| C    | 1.207495  | -10.542516 | -1.296135 | C    | 3.122983  | -2.609734 | 3.614024  |
| H    | 0.123275  | -10.436239 | -1.159135 | H    | 2.910695  | -3.559907 | 4.122638  |
| H    | 1.418467  | -10.363500 | -2.356474 | H    | 4.198877  | -2.434961 | 3.703337  |
| C    | 1.936981  | -9.508017  | -0.414795 | N    | 1.459053  | -3.102723 | 1.790774  |
| H    | 3.016018  | -9.712085  | -0.383828 | H    | 0.718309  | -3.390152 | 2.438547  |
| H    | 1.572383  | -9.594789  | 0.617767  | C    | 2.731101  | -2.722920 | 2.181236  |
| C    | 1.733062  | -8.051238  | -0.906652 | C    | 1.382276  | -2.998987 | 0.444574  |
| H    | 0.671342  | -7.934394  | -1.179982 | H    | 0.510122  | -3.249912 | -0.137093 |
| H    | 2.296769  | -7.880990  | -1.827035 | N    | 2.531643  | -2.577778 | -0.058229 |
| C    | 2.015592  | -7.004882  | 0.142961  | C    | 3.382914  | -2.414646 | 1.017480  |
| H    | 1.273089  | -6.987245  | 0.942193  | H    | 4.408515  | -2.103494 | 0.892959  |
| C    | 3.005756  | -6.091314  | 0.292537  | C    | 0.204741  | 2.883177  | -1.231870 |
| H    | 2.884000  | -5.440240  | 1.157585  | H    | -0.845369 | 3.105997  | -1.450102 |
| C    | 4.261887  | -5.806489  | -0.430723 | H    | 0.334183  | 2.961246  | -0.148827 |
| H    | 4.963868  | -5.313078  | 0.248158  | N    | -0.262791 | 0.778389  | -2.564661 |
| H    | 4.058379  | -4.778769  | -1.260190 | H    | -1.175588 | 1.093982  | -2.903493 |
| C    | 4.911522  | -6.835885  | -1.269721 | C    | 0.544224  | 1.494470  | -1.694040 |
| H    | 4.324864  | -7.244261  | -2.088465 | C    | 0.333228  | -0.401207 | -2.847464 |
| C    | 6.167681  | -7.302934  | -1.126022 | H    | -0.093576 | -1.151745 | -3.492300 |
| H    | 6.513279  | -8.053732  | -1.840485 | N    | 1.496184  | -0.495347 | -2.210729 |
| C    | 7.174572  | -6.940008  | -0.063338 | C    | 1.634898  | 0.683137  | -1.489892 |
| H    | 7.262189  | -7.777317  | 0.651090  | H    | 2.508887  | 0.885533  | -0.891939 |
| H    | 6.824412  | -6.083760  | 0.522883  | C    | 2.976154  | 0.383461  | -5.380986 |
| C    | 8.573134  | -6.651012  | -0.636695 | H    | 2.070165  | 0.847036  | -5.791405 |
| H    | 8.505637  | -5.819934  | -1.347574 | H    | 2.967406  | 0.560937  | -4.302333 |
| H    | 8.894998  | -7.522037  | -1.224046 | N    | 3.260250  | -2.045773 | -4.640194 |
| C    | 9.652304  | -6.379546  | 0.422218  | C    | 2.999543  | -1.098322 | -5.630079 |
| H    | 10.636476 | -6.351816  | -0.062852 | C    | 3.395977  | -3.207046 | -5.269589 |
| H    | 9.672644  | -7.213948  | 1.138416  | H    | 3.621189  | -4.151953 | -4.809751 |
| C    | 7.482124  | 0.683053   | -0.172883 | N    | 3.211448  | -3.070190 | -6.600632 |
| H    | 8.240850  | -0.053084  | 0.129665  | H    | 3.245551  | -3.792491 | -7.318098 |
| H    | 8.015882  | 1.406407   | -0.797970 | C    | 2.940258  | -1.742002 | -6.842865 |
| N    | 6.701497  | -0.438494  | -2.259958 | H    | 2.765177  | -1.379746 | -7.846726 |
| H    | 7.605917  | -0.329068  | -2.724476 | C    | 1.001941  | -4.502897 | -3.174174 |
| C    | 6.418486  | 0.017350   | -0.987697 | O    | 1.909255  | -5.369255 | -3.222450 |
| C    | 5.602247  | -1.006644  | -2.782091 | O    | 1.066755  | -3.324333 | -2.706127 |
| H    | 5.550298  | -1.430236  | -3.770737 | Fe   | 2.864374  | -2.230540 | -2.212867 |
| N    | 4.601169  | -0.971751  | -1.909495 | O    | 3.932872  | -3.957380 | -2.275007 |
| C    | 5.099142  | -0.311151  | -0.791743 | H    | 3.288372  | -4.576013 | -2.724396 |
| H    | 4.475494  | -0.114792  | 0.064981  |      |           |           |           |

**Table S6.** Cartesian atomic coordinates of the QM region for the optimized Transition State geometry (ONIOM, Electrostatic Embedding) of structure VII. *x*, *y* and *z* are given in Å.

| Atom | x         | y         | z         | Atom | x         | y         | z         |
|------|-----------|-----------|-----------|------|-----------|-----------|-----------|
| C    | 5.658023  | -6.527227 | -6.442696 | C    | 3.495213  | -2.505119 | 2.912805  |
| H    | 4.965094  | -6.147842 | -7.201758 | H    | 3.514084  | -3.566838 | 3.192176  |
| H    | 6.629105  | -6.686838 | -6.932648 | H    | 4.511617  | -2.124306 | 3.069909  |
| C    | 5.778768  | -5.558176 | -5.266485 | N    | 2.283043  | -3.305268 | 0.847074  |
| H    | 6.332825  | -6.039935 | -4.449324 | H    | 1.937199  | -4.172679 | 1.267373  |
| H    | 4.782583  | -5.325071 | -4.877172 | C    | 3.111926  | -2.394163 | 1.473399  |
| C    | 6.511278  | -4.249945 | -5.593698 | C    | 2.082736  | -2.897641 | -0.425005 |
| H    | 7.500636  | -4.504102 | -6.011675 | H    | 1.464239  | -3.427447 | -1.126396 |
| H    | 6.716031  | -3.728975 | -4.655298 | N    | 2.741748  | -1.766139 | -0.667940 |
| C    | 5.792527  | -3.311647 | -6.529324 | C    | 3.373902  | -1.445607 | 0.521029  |
| H    | 5.330869  | -3.747329 | -7.415126 | H    | 4.013911  | -0.583709 | 0.621032  |
| C    | 5.682023  | -1.976958 | -6.347012 | C    | -1.720589 | 2.474548  | -0.545012 |
| H    | 5.099927  | -1.412226 | -7.074700 | H    | -2.770106 | 2.384799  | -0.847260 |
| C    | 6.285260  | -1.217053 | -5.224953 | H    | -1.680994 | 2.297122  | 0.532878  |
| H    | 5.422788  | -1.453680 | -4.150131 | N    | -1.392938 | 0.600039  | -2.216951 |
| H    | 6.085984  | -0.142069 | -5.280562 | H    | -2.360460 | 0.582975  | -2.536557 |
| C    | 7.730711  | -1.522449 | -5.048416 | C    | -0.875177 | 1.464523  | -1.267822 |
| H    | 8.108579  | -2.170641 | -5.839504 | C    | -0.389677 | -0.166288 | -2.706177 |
| C    | 8.690889  | -1.134301 | -4.184366 | H    | -0.521573 | -0.919328 | -3.466618 |
| H    | 9.693003  | -1.495736 | -4.431613 | N    | 0.761162  | 0.154051  | -2.125171 |
| C    | 8.681125  | -0.317561 | -2.927962 | C    | 0.470870  | 1.173859  | -1.229829 |
| H    | 7.666655  | -0.079976 | -2.596177 | H    | 1.232199  | 1.633135  | -0.616874 |
| H    | 9.178603  | 0.642346  | -3.138881 | C    | 1.332554  | 2.226750  | -4.950442 |
| C    | 9.481897  | -1.047643 | -1.821748 | H    | 0.338897  | 2.555351  | -5.278471 |
| H    | 10.318537 | -1.566085 | -2.307308 | H    | 1.302630  | 2.122839  | -3.862789 |
| H    | 8.853438  | -1.821228 | -1.364209 | N    | 2.431872  | -0.058645 | -4.918515 |
| C    | 10.022895 | -0.097584 | -0.750088 | C    | 1.696659  | 0.920695  | -5.576109 |
| H    | 9.197355  | 0.375083  | -0.202772 | C    | 2.713372  | -0.981381 | -5.830363 |
| H    | 10.575868 | 0.710384  | -1.241175 | H    | 3.253626  | -1.893941 | -5.647614 |
| C    | 6.425657  | 3.003814  | -0.262993 | N    | 2.204666  | -0.649884 | -7.035366 |
| H    | 7.414030  | 2.520146  | -0.206191 | H    | 2.230478  | -1.197088 | -7.900116 |
| H    | 6.606716  | 3.990626  | -0.704339 | C    | 1.542216  | 0.548504  | -6.888290 |
| N    | 5.763413  | 2.126232  | -2.517890 | H    | 1.034659  | 1.022568  | -7.716617 |
| H    | 6.538723  | 2.572208  | -3.018614 | C    | 1.921829  | -3.522949 | -3.831418 |
| C    | 5.511934  | 2.222845  | -1.159745 | O    | 3.098730  | -3.921621 | -3.983556 |
| C    | 4.795838  | 1.384076  | -3.089273 | O    | 1.543256  | -2.425306 | -3.306056 |
| H    | 4.762908  | 1.142075  | -4.139354 | Fe   | 2.694197  | -0.788598 | -2.709845 |
| N    | 3.921814  | 0.967768  | -2.182993 | O    | 4.506549  | -1.668473 | -3.266220 |
| C    | 4.350275  | 1.505998  | -0.974236 | H    | 4.202113  | -2.581616 | -3.509881 |
| H    | 3.774883  | 1.379630  | -0.070873 |      |           |           |           |

**Table S7.** Cartesian atomic coordinates of the QM region for the optimized Transition State geometry (ONIOM, Electrostatic Embedding) of structure X. *x*, *y* and *z* are given in Å.

| Atom | x         | y         | z         | Atom | x         | y         | z         |
|------|-----------|-----------|-----------|------|-----------|-----------|-----------|
| C    | 6.243460  | -7.426489 | -4.910312 | C    | 3.722391  | -2.228630 | 2.969626  |
| H    | 7.071994  | -7.647085 | -5.598962 | H    | 3.771682  | -3.268350 | 3.325093  |
| H    | 6.697898  | -7.177681 | -3.940717 | H    | 4.736922  | -1.825280 | 3.050062  |
| C    | 5.443127  | -6.222235 | -5.419359 | N    | 2.314425  | -3.103223 | 1.060548  |
| H    | 4.584692  | -6.014988 | -4.771690 | H    | 1.899510  | -3.894601 | 1.547956  |
| H    | 5.042718  | -6.430577 | -6.421893 | C    | 3.262187  | -2.222597 | 1.547964  |
| C    | 6.329277  | -4.965247 | -5.485592 | C    | 2.034298  | -2.769699 | -0.216380 |
| H    | 7.288133  | -5.254462 | -5.945988 | H    | 1.316161  | -3.294640 | -0.818364 |
| H    | 6.583219  | -4.644027 | -4.470032 | N    | 2.752485  | -1.718524 | -0.598263 |
| C    | 5.736846  | -3.832435 | -6.278365 | C    | 3.522727  | -1.373365 | 0.502437  |
| H    | 5.260218  | -4.120419 | -7.218171 | H    | 4.237926  | -0.565483 | 0.472650  |
| C    | 5.784491  | -2.515495 | -5.987857 | C    | -1.653860 | 2.521049  | -0.827155 |
| H    | 5.337802  | -1.836787 | -6.715986 | H    | -2.692916 | 2.567385  | -1.162711 |
| C    | 6.347919  | -1.859773 | -4.793442 | H    | -1.687289 | 2.330829  | 0.246950  |
| H    | 6.914457  | -2.531679 | -4.146203 | N    | -1.508891 | 0.495532  | -2.366557 |
| H    | 5.268187  | -1.703628 | -3.968213 | H    | -2.504045 | 0.495528  | -2.609013 |
| C    | 7.036730  | -0.583168 | -5.050781 | C    | -0.909177 | 1.418327  | -1.524267 |
| H    | 6.713942  | -0.066315 | -5.956392 | C    | -0.564078 | -0.376312 | -2.799392 |
| C    | 8.025507  | 0.009171  | -4.342127 | H    | -0.756449 | -1.186746 | -3.485895 |
| H    | 8.456030  | 0.923561  | -4.749253 | N    | 0.624096  | -0.062212 | -2.286901 |
| C    | 8.559822  | -0.424634 | -3.004342 | C    | 0.417374  | 1.056726  | -1.498122 |
| H    | 7.882906  | -1.152268 | -2.552539 | H    | 1.228134  | 1.520880  | -0.958112 |
| H    | 8.537177  | 0.445977  | -2.332031 | C    | 1.441296  | 1.919858  | -5.170399 |
| C    | 9.995085  | -0.990050 | -2.990777 | H    | 0.428618  | 2.243840  | -5.440779 |
| H    | 10.685687 | -0.278553 | -3.463197 | H    | 1.489418  | 1.905552  | -4.078574 |
| H    | 10.032055 | -1.908932 | -3.600275 | N    | 2.304624  | -0.473344 | -4.958966 |
| C    | 10.451391 | -1.302642 | -1.556989 | C    | 1.703081  | 0.539991  | -5.699315 |
| H    | 9.744268  | -1.991661 | -1.075044 | C    | 2.457646  | -1.501642 | -5.785459 |
| H    | 10.442059 | -0.385362 | -0.955481 | H    | 2.909616  | -2.448557 | -5.536946 |
| C    | 6.530406  | 2.848997  | -0.797468 | N    | 1.973423  | -1.215502 | -7.009975 |
| H    | 7.462996  | 2.269573  | -0.709771 | H    | 2.024251  | -1.810173 | -7.836228 |
| H    | 6.801276  | 3.760366  | -1.342215 | C    | 1.493327  | 0.076704  | -6.974580 |
| N    | 5.654334  | 1.910500  | -2.950762 | H    | 1.046718  | 0.535557  | -7.845683 |
| H    | 6.359315  | 2.362753  | -3.542467 | C    | 1.967735  | -3.913055 | -3.424535 |
| C    | 5.510979  | 2.083641  | -1.584926 | O    | 3.175298  | -4.243270 | -3.563719 |
| C    | 4.633028  | 1.162254  | -3.403705 | O    | 1.514210  | -2.763877 | -3.129763 |
| H    | 4.529057  | 0.846613  | -4.429275 | Fe   | 2.595051  | -0.972641 | -2.721254 |
| N    | 3.818734  | 0.821647  | -2.411577 | O    | 4.329486  | -1.896837 | -3.106998 |
| C    | 4.352259  | 1.411744  | -1.273552 | H    | 4.057018  | -2.836550 | -3.315972 |
| H    | 3.866665  | 1.312792  | -0.316568 |      |           |           |           |



**Table S8.** Cartesian atomic coordinates of the QM region for the optimized Transition State geometry (ONIOM, Electrostatic Embedding) of structure XI. *x*, *y* and *z* are given in Å.

| Atom | x         | y         | z         | Atom | x         | y         | z         |
|------|-----------|-----------|-----------|------|-----------|-----------|-----------|
| C    | 6.260183  | -6.930579 | -5.449451 | C    | 3.287976  | -2.705052 | 2.619209  |
| H    | 7.185551  | -7.211983 | -5.973311 | H    | 3.329205  | -3.769825 | 2.883674  |
| H    | 6.548275  | -6.672806 | -4.421274 | H    | 4.289977  | -2.300309 | 2.802302  |
| C    | 5.630802  | -5.700661 | -6.115948 | N    | 2.180355  | -3.526691 | 0.504868  |
| H    | 4.681369  | -5.437564 | -5.637111 | H    | 1.876603  | -4.418656 | 0.896407  |
| H    | 5.416197  | -5.900074 | -7.175108 | C    | 2.927321  | -2.575604 | 1.173890  |
| C    | 6.595860  | -4.507716 | -5.997557 | C    | 1.967270  | -3.099491 | -0.757546 |
| H    | 7.577962  | -4.813705 | -6.397858 | H    | 1.400314  | -3.656180 | -1.480801 |
| H    | 6.753782  | -4.309452 | -4.934225 | N    | 2.547559  | -1.918096 | -0.954951 |
| C    | 6.171755  | -3.229453 | -6.662991 | C    | 3.139961  | -1.584662 | 0.251500  |
| H    | 5.863933  | -3.305503 | -7.707265 | H    | 3.741443  | -0.698053 | 0.368227  |
| C    | 6.213434  | -1.999903 | -6.103790 | C    | -1.660384 | 2.395839  | -0.731083 |
| H    | 5.939633  | -1.154721 | -6.738195 | H    | -2.715912 | 2.408824  | -1.019076 |
| C    | 6.585034  | -1.654319 | -4.719924 | H    | -1.643232 | 2.202731  | 0.346830  |
| H    | 6.977964  | -2.487652 | -4.133860 | N    | -1.533073 | 0.453836  | -2.381959 |
| H    | 5.373732  | -1.560435 | -4.069578 | H    | -2.524148 | 0.438762  | -2.614111 |
| C    | 7.363783  | -0.418372 | -4.545077 | C    | -0.923015 | 1.329938  | -1.495018 |
| H    | 7.197380  | 0.342422  | -5.311898 | C    | -0.586536 | -0.340039 | -2.941059 |
| C    | 8.262485  | -0.106241 | -3.577564 | H    | -0.799504 | -1.104519 | -3.672636 |
| H    | 8.736209  | 0.875081  | -3.641275 | N    | 0.614255  | -0.023975 | -2.467266 |
| C    | 8.669575  | -0.926378 | -2.378096 | C    | 0.412892  | 1.014036  | -1.571619 |
| H    | 8.096808  | -1.858175 | -2.318323 | H    | 1.238662  | 1.472909  | -1.052411 |
| H    | 8.421535  | -0.347444 | -1.471773 | C    | 1.538734  | 2.213871  | -5.268941 |
| C    | 10.172126 | -1.271235 | -2.287822 | H    | 0.576608  | 2.625043  | -5.597451 |
| H    | 10.767920 | -0.379119 | -2.523895 | H    | 1.478192  | 2.082442  | -4.184793 |
| H    | 10.415592 | -2.016535 | -3.055636 | N    | 2.454950  | -0.156320 | -5.284971 |
| C    | 10.524520 | -1.804548 | -0.891234 | C    | 1.771623  | 0.883479  | -5.911797 |
| H    | 9.809660  | -2.584567 | -0.606184 | C    | 2.552460  | -1.127501 | -6.184595 |
| H    | 10.430190 | -1.001833 | -0.147591 | H    | 3.038001  | -2.077810 | -6.025630 |
| C    | 6.197892  | 2.897001  | -0.539899 | N    | 1.953508  | -0.779267 | -7.346102 |
| H    | 7.161028  | 2.368683  | -0.462185 | H    | 1.777440  | -1.379104 | -8.150168 |
| H    | 6.436050  | 3.874285  | -0.973726 | C    | 1.443530  | 0.491999  | -7.185507 |
| N    | 5.540852  | 2.049559  | -2.804650 | H    | 0.886787  | 0.983078  | -7.970609 |
| H    | 6.281661  | 2.556675  | -3.299087 | C    | 1.899265  | -3.692896 | -4.110123 |
| C    | 5.273197  | 2.149734  | -1.451010 | O    | 3.098760  | -4.031575 | -4.243912 |
| C    | 4.598801  | 1.281004  | -3.379962 | O    | 1.462063  | -2.584602 | -3.651009 |
| H    | 4.589147  | 1.011553  | -4.424337 | Fe   | 2.548609  | -0.931866 | -2.993310 |
| N    | 3.720283  | 0.858773  | -2.478414 | O    | 4.335199  | -1.792203 | -3.352704 |
| C    | 4.124915  | 1.414637  | -1.273128 | H    | 4.075810  | -2.704731 | -3.658706 |
| H    | 3.581798  | 1.222458  | -0.362327 |      |           |           |           |

**Table S9.** Cartesian atomic coordinates of the QM region for the optimized Transition State geometry (ONIOM, Electrostatic Embedding) of structure XIV. *x*, *y* and *z* are given in Å.

| Atom | x         | y          | z         | Atom | x         | y         | z         |
|------|-----------|------------|-----------|------|-----------|-----------|-----------|
| C    | 0.778573  | -10.327837 | -0.365365 | C    | 2.982095  | -2.193532 | 3.200740  |
| H    | -0.311371 | -10.265776 | -0.463491 | H    | 2.816401  | -3.040303 | 3.882650  |
| H    | 1.202129  | -10.157075 | -1.361033 | H    | 4.066307  | -2.048038 | 3.142559  |
| C    | 1.302550  | -9.254444  | 0.600581  | N    | 1.167799  | -3.061027 | 1.675497  |
| H    | 2.401837  | -9.277601  | 0.619326  | H    | 0.553677  | -3.407293 | 2.417775  |
| H    | 0.970041  | -9.457897  | 1.628617  | C    | 2.430477  | -2.526077 | 1.855960  |
| C    | 0.852373  | -7.834666  | 0.179943  | C    | 0.929908  | -3.151494 | 0.348970  |
| H    | -0.236640 | -7.758097  | 0.285340  | H    | 0.029382  | -3.559258 | -0.082379 |
| H    | 1.047440  | -7.698527  | -0.886257 | N    | 1.959109  | -2.689579 | -0.340653 |
| C    | 1.518745  | -6.742523  | 0.977291  | C    | 2.903534  | -2.305805 | 0.589739  |
| H    | 1.078557  | -6.513842  | 1.950062  | H    | 3.867778  | -1.919194 | 0.302040  |
| C    | 2.635753  | -6.066518  | 0.625884  | C    | -0.502462 | 2.495018  | -1.708748 |
| H    | 3.016647  | -5.315232  | 1.317523  | H    | -1.563766 | 2.755056  | -1.786654 |
| C    | 3.383451  | -6.264736  | -0.634321 | H    | -0.191805 | 2.703903  | -0.682054 |
| H    | 3.185024  | -5.211798  | -1.419796 | N    | -1.208323 | 0.286507  | -2.759254 |
| H    | 2.876399  | -6.999717  | -1.257910 | H    | -2.138403 | 0.602222  | -3.040033 |
| C    | 4.835813  | -6.559351  | -0.625846 | C    | -0.292447 | 1.041759  | -2.036854 |
| H    | 5.105273  | -7.414340  | -1.245609 | C    | -0.671320 | -0.924445 | -3.027545 |
| C    | 5.871377  | -5.953521  | -0.010684 | H    | -1.187059 | -1.700909 | -3.569414 |
| H    | 6.844381  | -6.422057  | -0.157003 | N    | 0.553926  | -1.003125 | -2.517854 |
| C    | 5.873206  | -4.684180  | 0.788227  | C    | 0.794630  | 0.216117  | -1.899178 |
| H    | 6.308640  | -4.869140  | 1.782963  | H    | 1.736266  | 0.438339  | -1.425381 |
| H    | 4.847366  | -4.344306  | 0.954153  | C    | 1.864504  | -0.509261 | -5.906347 |
| C    | 6.639670  | -3.521846  | 0.110662  | H    | 0.941836  | -0.035790 | -6.264550 |
| H    | 6.337808  | -2.598476  | 0.623767  | H    | 1.986374  | -0.212839 | -4.860780 |
| H    | 6.285265  | -3.411321  | -0.920750 | N    | 1.956726  | -2.867352 | -4.914007 |
| C    | 8.175048  | -3.568355  | 0.142452  | C    | 1.745729  | -1.998344 | -5.984013 |
| H    | 8.521858  | -3.787400  | 1.162122  | C    | 1.815415  | -4.094571 | -5.407527 |
| H    | 8.544904  | -2.569291  | -0.122296 | H    | 1.867953  | -5.010965 | -4.845038 |
| C    | 6.764599  | 0.606640   | -1.546629 | N    | 1.510945  | -4.059823 | -6.721788 |
| H    | 7.630661  | -0.038224  | -1.331023 | H    | 1.347762  | -4.834300 | -7.359854 |
| H    | 7.104517  | 1.293731   | -2.328335 | C    | 1.459944  | -2.740041 | -7.100706 |
| N    | 5.819827  | -0.968106  | -3.244112 | H    | 1.216338  | -2.453969 | -8.113464 |
| H    | 6.638028  | -0.896457  | -3.849997 | C    | -0.244880 | -5.034773 | -2.878854 |
| C    | 5.637578  | -0.229363  | -2.086495 | O    | 0.612421  | -5.965599 | -2.860523 |
| C    | 4.699221  | -1.672302  | -3.501042 | O    | -0.055336 | -3.817863 | -2.594129 |
| H    | 4.577468  | -2.323895  | -4.351125 | Fe   | 1.926505  | -2.696880 | -2.539733 |
| N    | 3.778983  | -1.447093  | -2.572256 | O    | 2.761668  | -4.535387 | -2.472081 |
| C    | 4.354360  | -0.528063  | -1.695112 | H    | 1.968044  | -5.144242 | -2.608122 |
| H    | 3.812840  | -0.143277  | -0.847329 |      |           |           |           |
